# Supplementary material
Source: publisher figshare collection journal article supplement (https://frontiersin.figshare.com/ndownloader/files/24647666)
Supplement: Supplementary file [file 24647666]

**A)**

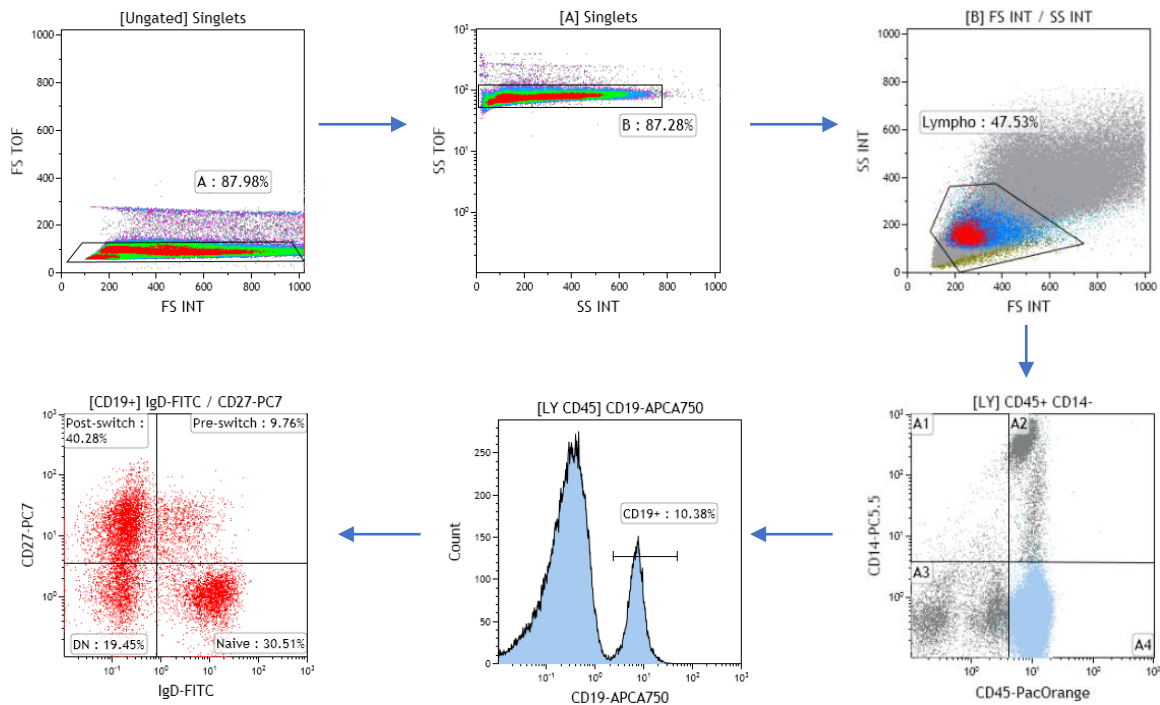

**B)**

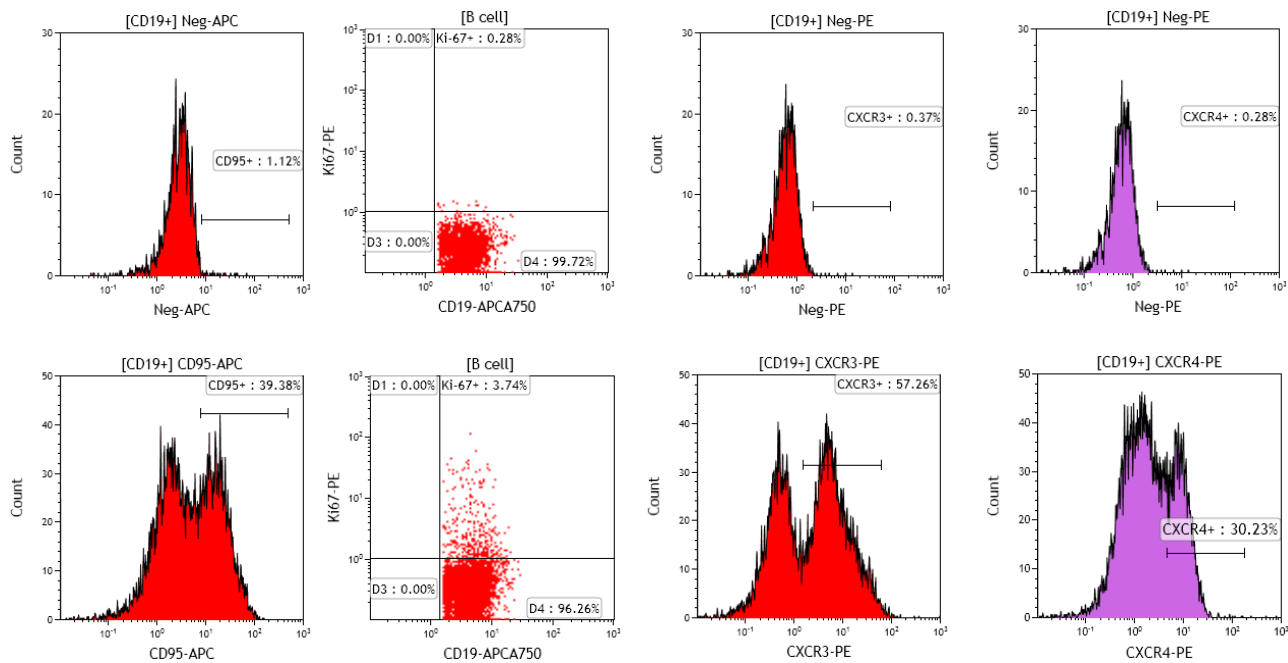

**Supplementary Figure 1: Gating strategy of B cell subset identification (A). Representative FACS plots of CD95, Ki-67, CXCR3 and CXCR4 expression by B cells (B).**

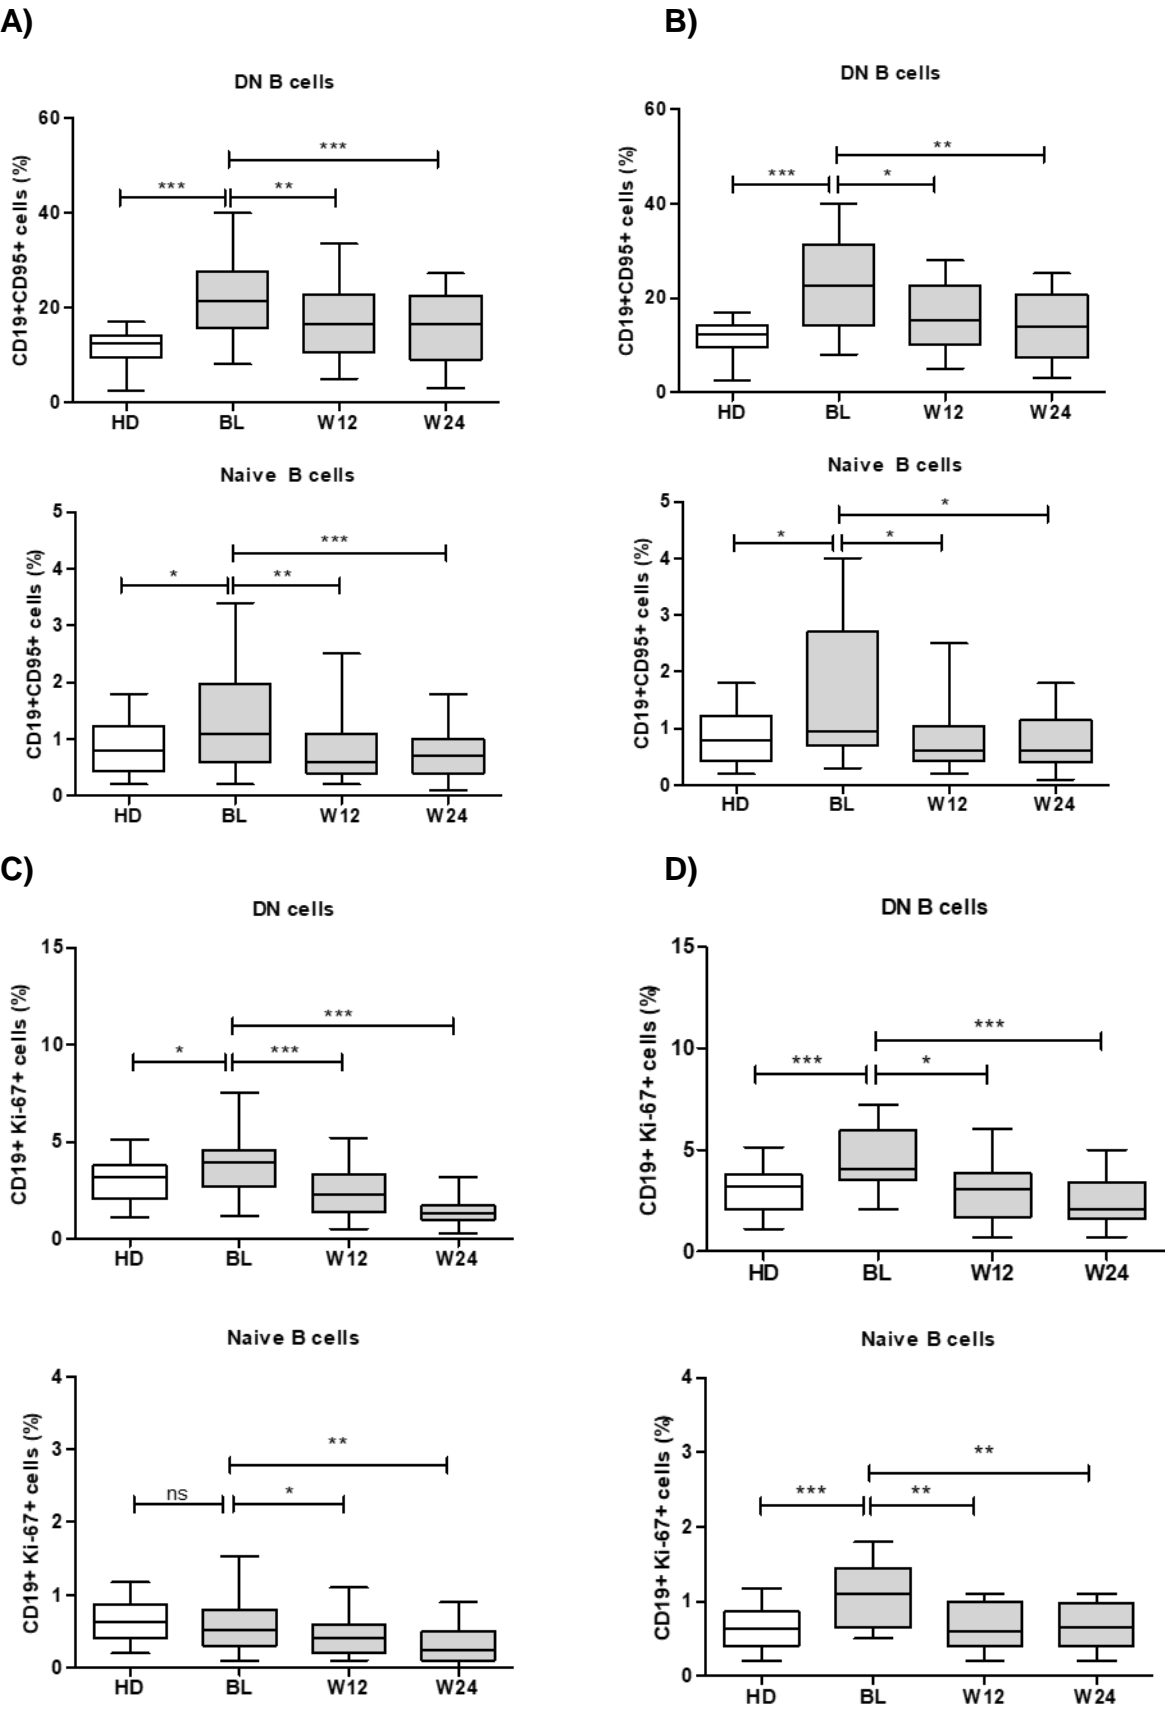

**Supplementary Figure 2: Modulation of CD95 expression on B cell subsets during IL-6R and TNF- $\alpha$  inhibition therapy.** For CD19+CD95+ expressing cells DN and naïve B cells are significantly reduced during IL-6R inhibition (A) and TNF- $\alpha$  inhibition (B) therapy. CD19+Ki-67+ expressing cells from DN and naïve B cells are significantly reduced during IL-6R inhibition (A) and TNF- $\alpha$  inhibition (B) therapy. Values were consistently compared with baseline levels by using the Student unpaired t-test (\*\*\*p<0.0001, \*\*p<0.001 and \*p<0.01). BL = baseline, W12 = week 12 and W24 = week 24.

A)

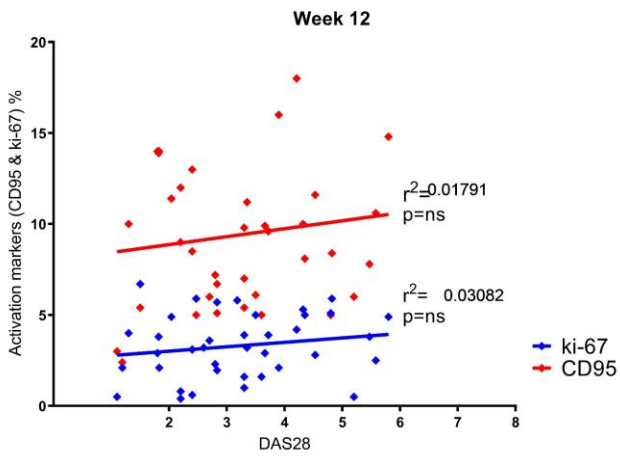

B)

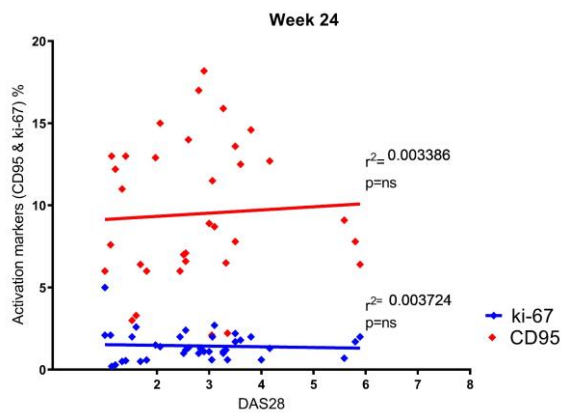

**Supplementary Figure 3: Correlation between activated B cells and disease activity during treatment.** A non-significant correlation between activated B cells, identified by their CD95+ or Ki-67+ expression, and DAS28 can be observed at week 12 (A) and week 24(B) during cytokine inhibition therapies. The relationship between variables was evaluated using the Pearson linear correlation test. A two-sided p-value of <0.05 was considered statistically significant

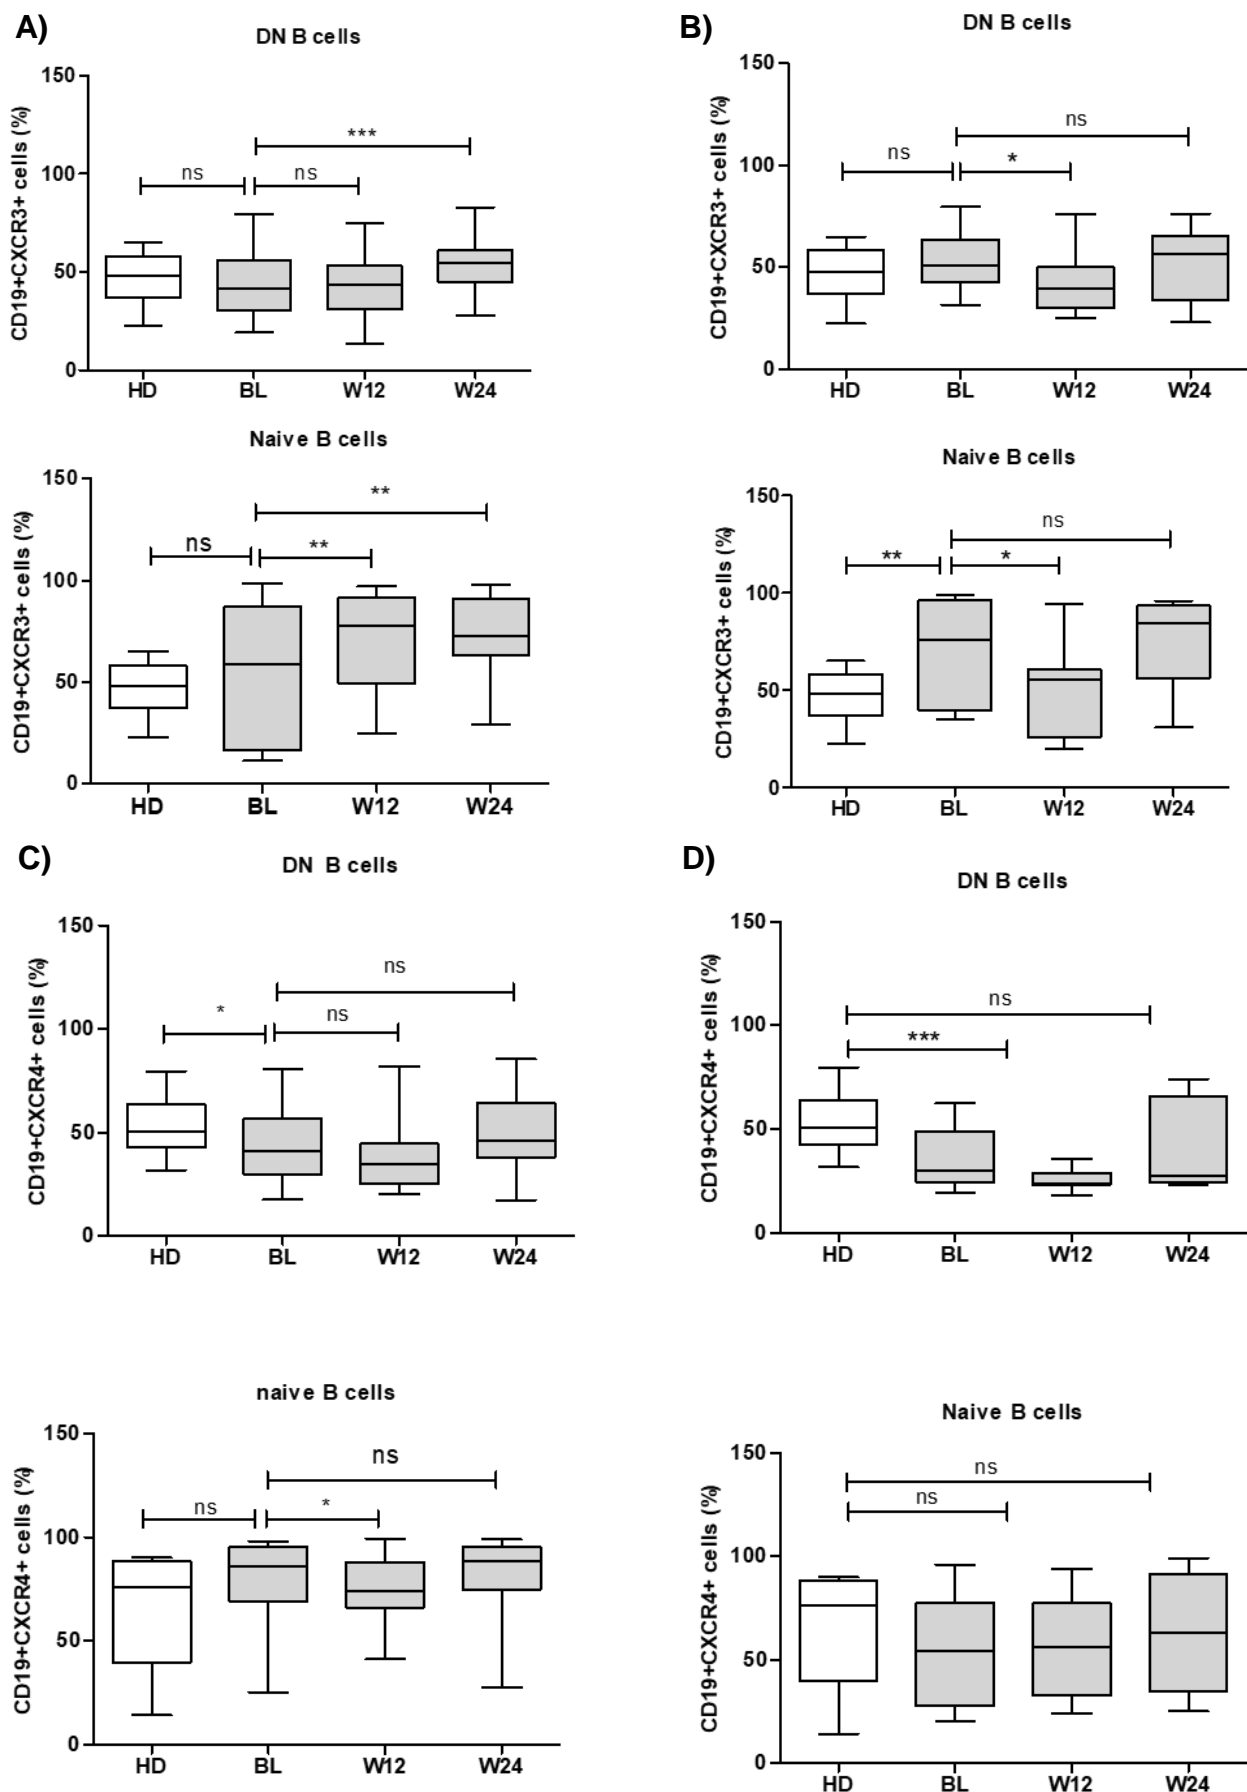

**Supplementary Figure 4: Expression of CXCR3 and CXCR4 in B cell subsets during IL-6R and TNF inhibition therapy.** CXCR3 expression on DN and naïve B cells during IL-6R inhibition (A) and during TNF- $\alpha$  inhibition (B) therapy. CXCR4 expression on DN and naïve B cells during IL-6R inhibition (C) and TNF- $\alpha$  inhibition (D) therapy. Values were consistently compared with baseline levels using the Student unpaired t-test (\*\* $p < 0.0001$ , \*\* $p < 0.001$  and \* $p < 0.01$ ). BL = baseline, W12 = week 12, and W24 = week 24.
